# Supplementary material for: Extreme Hyperferritinemia: Causes and Prognosis
Source: MDPI journal article supplement (doi:10.3390/jcm11185438), 2022-09-16
Supplement: s1 [file s1]

# Supplementary Materials

related to

## Extreme hyperferritinemia: causes and prognosis

by Maxime Fauter, Sabine Mainbourg, Thomas El Jammal, Arthur Guerber, Zaepfel, Thomas Henry, Mathieu Gerfaud-Valentin, Pascal Sève, and Yvan Jamilloux

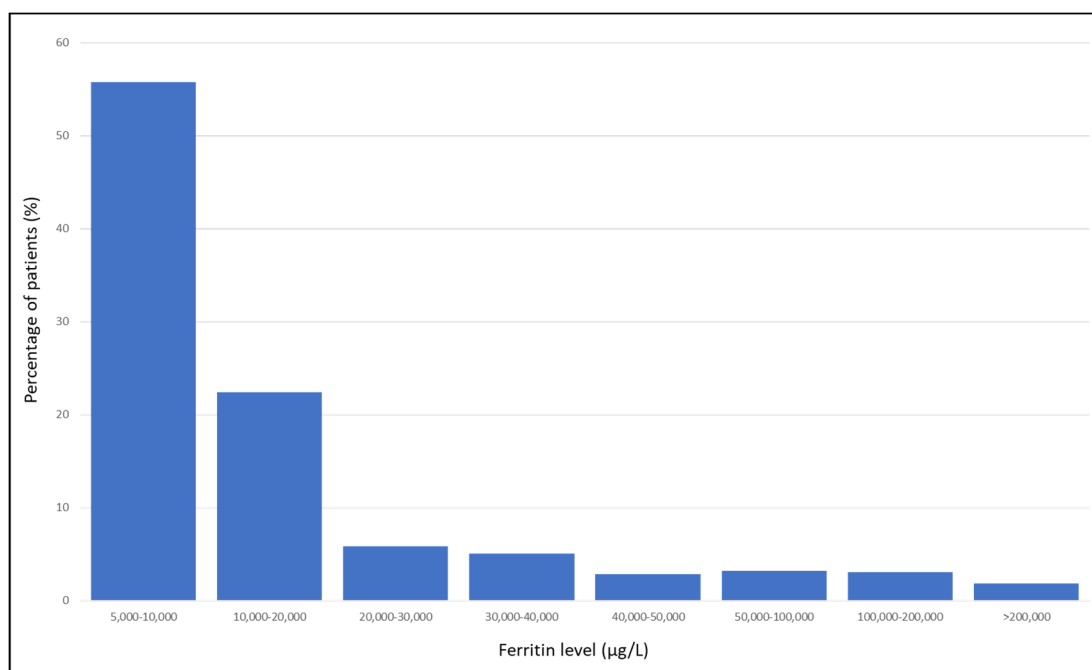

**Supplementary Figure S1.** Repartition of the patients according to different ferritin levels

**Supplementary Table S1.** Multivariate analysis by Cox regression model, adjusted for sex, age at diagnosis, ferritin levels and HLH status.

| Factor                              | Hazard Ratio | Lower CI | Upper CI | p-value |
|-------------------------------------|--------------|----------|----------|---------|
| Sex                                 | 0.93         | 0.66     | 1.30     | 0.664   |
| Age                                 | 1.02         | 1.00     | 1.03     | 0.004   |
| Ferritin levels (x10 <sup>5</sup> ) | 1.03         | 1.02     | 1.04     | <0.001  |
| HLH status                          | 1.60         | 1.07     | 2.40     | 0.022   |
